# Supplementary material
Source: PubMed Central journal article supplement (PMC11028160)
Supplement: 262_2017_2058_MOESM1_ESM.pdf [file 262_2017_2058_MOESM1_ESM.pdf]

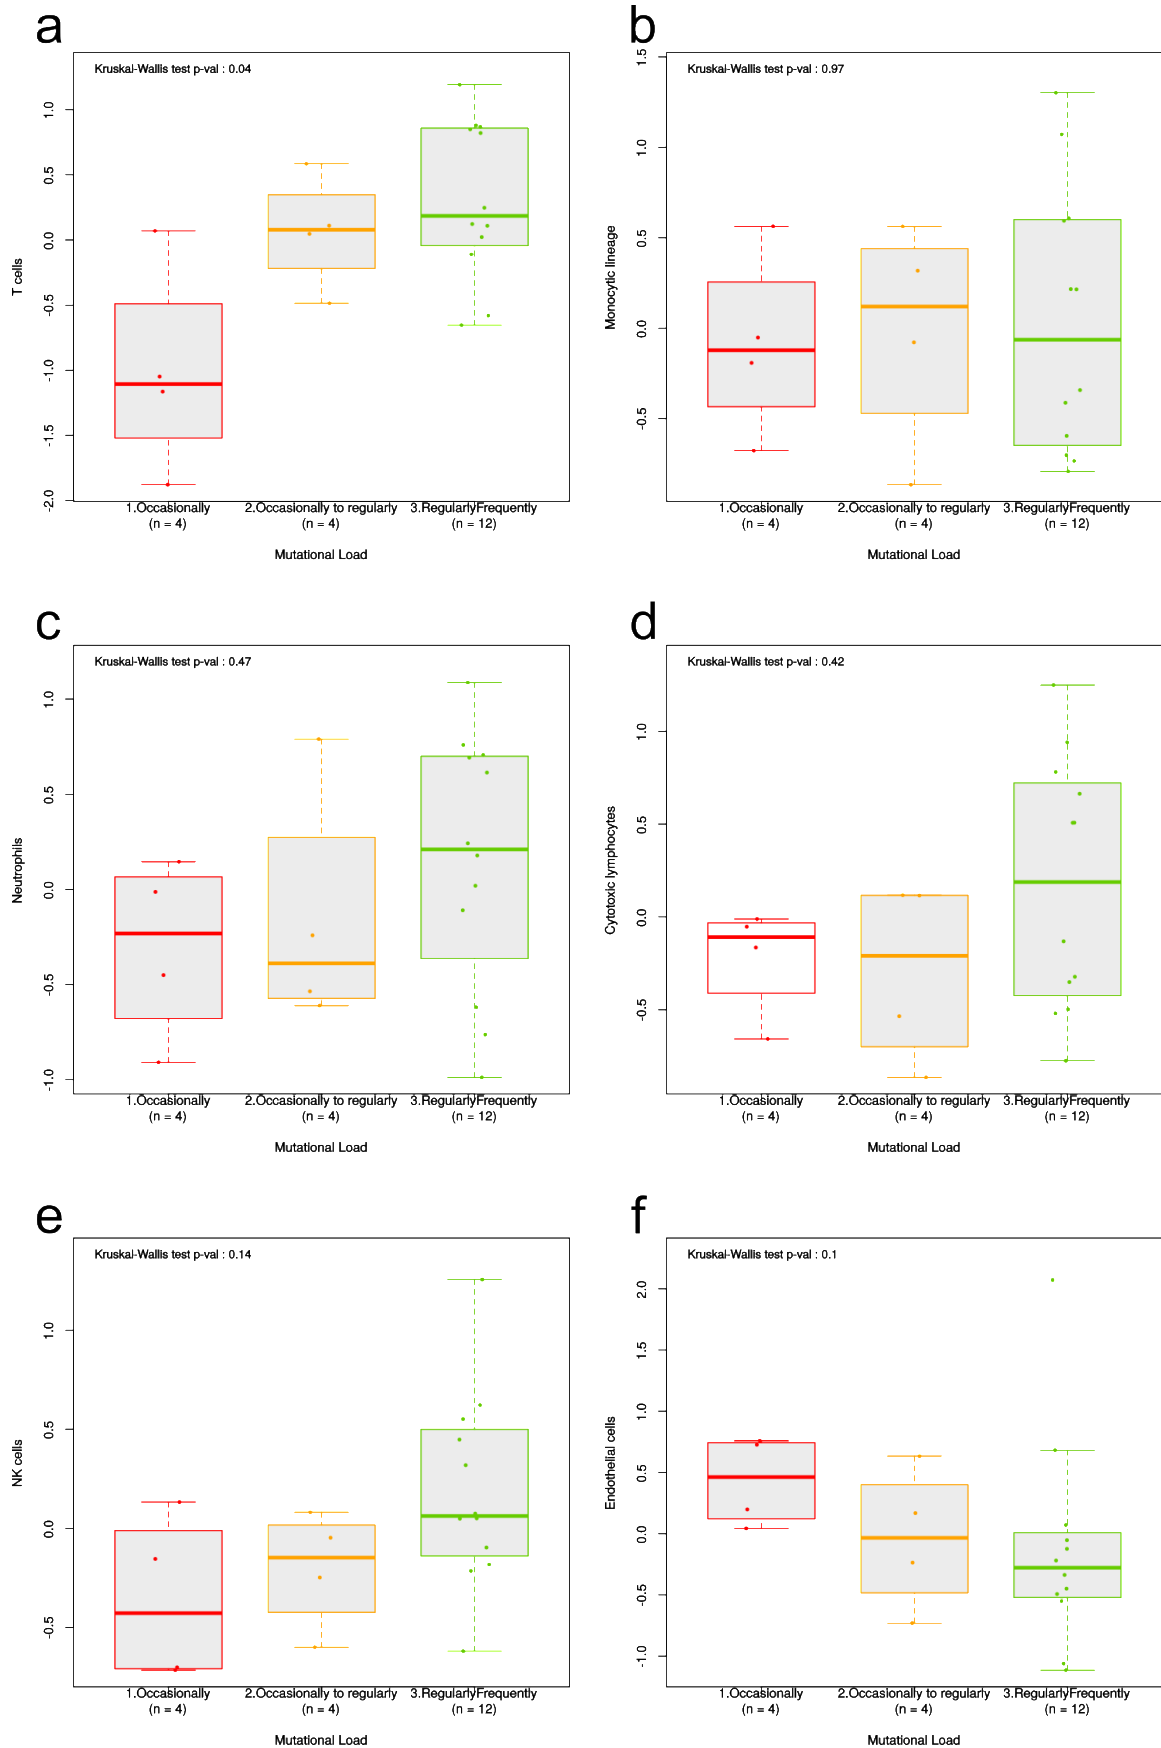

**Supplementary figure 1:** Infiltration of the different categories of cancers, based on their mutational burden, for **(a)** T cells, **(b)** Monocytic lineage, **(c)** Neutrophils, **(d)** Cytotoxic lymphocytes, **(e)** NK cells and **(f)** Endothelial cells.
